# Supplementary material for: Covalent immobilization of a polyoxometalate in a porous polymer matrix: a heterogeneous catalyst towards sustainability
Source: Royal Society of Chemistry journal article supplement (doi:10.1039/c3ra43373k), 2013-01-01
Supplement: c3ra43373k.pdf [file c3ra43373k.pdf]

## **Electronic Supplementary Information**

### **Covalent Immobilization of A Polyoxometalate in Porous Polymer**

#### **Matrix: A Heterogeneous Catalyst towards Sustainability**

Yu Xiao, Da Chen, Ning Ma, Zhanyao Hou, Minbiao Hu, Chunhong Wang,\* Wei Wang\*<sup>[a]</sup>

Key Laboratory of Functional Polymer Materials of Ministry of Education, Institute of Polymer Chemistry, Nankai University, Tianjin 300071, P. R. China

\*Corresponding author:

Prof. C.-H Wang

E-mail: wch2004@nankai.edu.cn

Tel/Fax: (+86) 22-23498126

Prof. W. Wang

E-mail: weiwang@nankai.edu.cn

Tel/Fax: (+86) 22-23498126

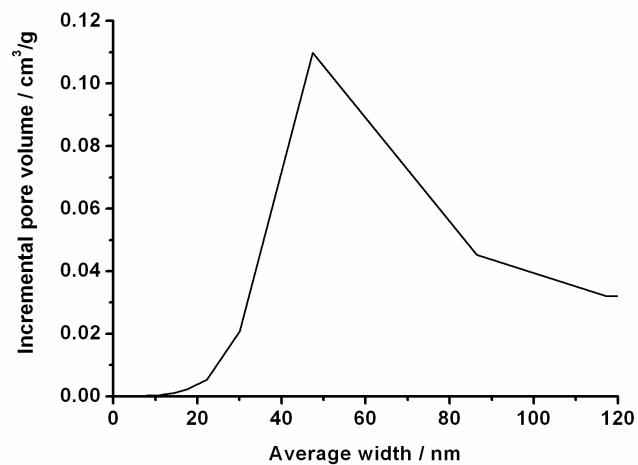

Fig. S1 Pore size distribution of **R1**.

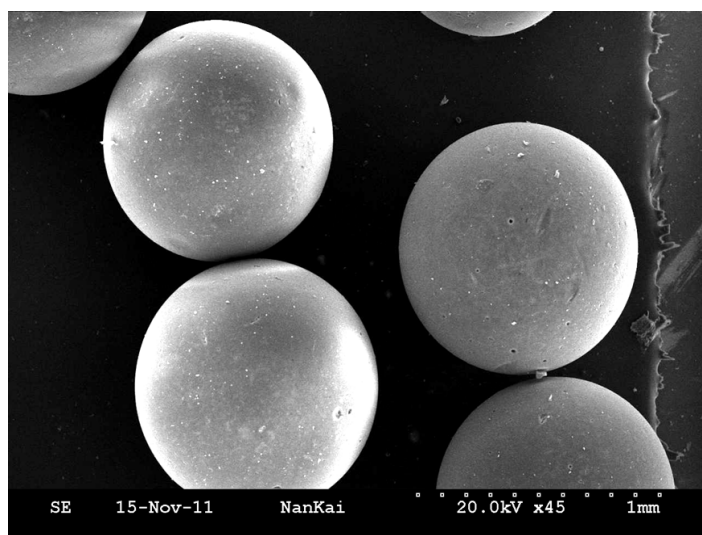

Fig. S2 SEM image of **R1**.

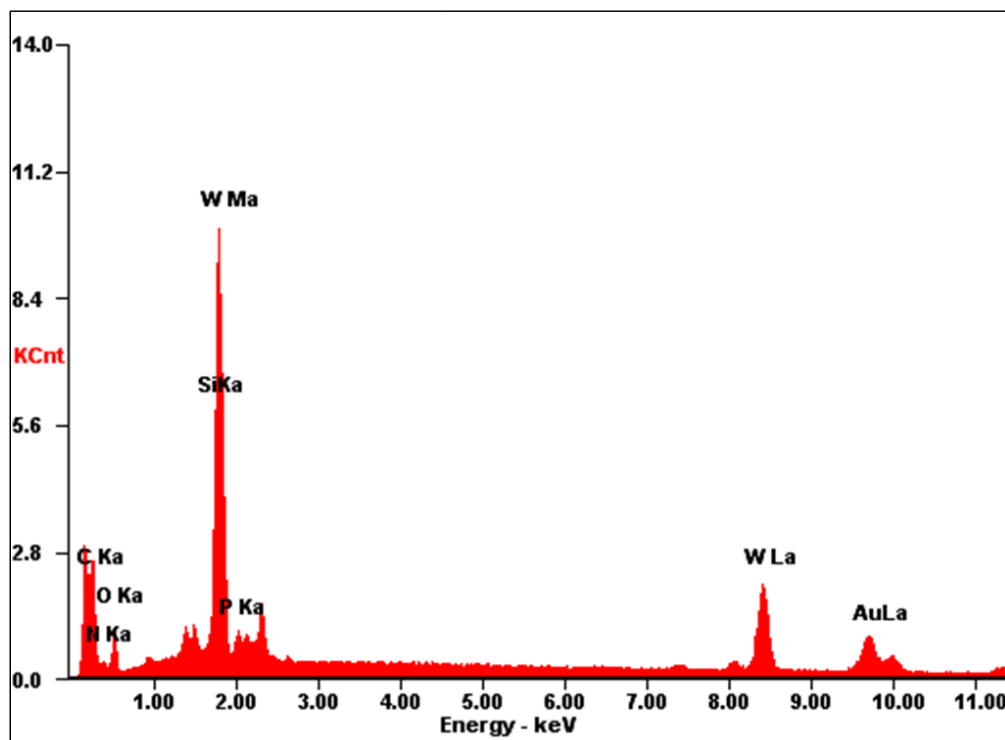

Fig. S3 EDX spectrum of the macroporous surface of **R3**

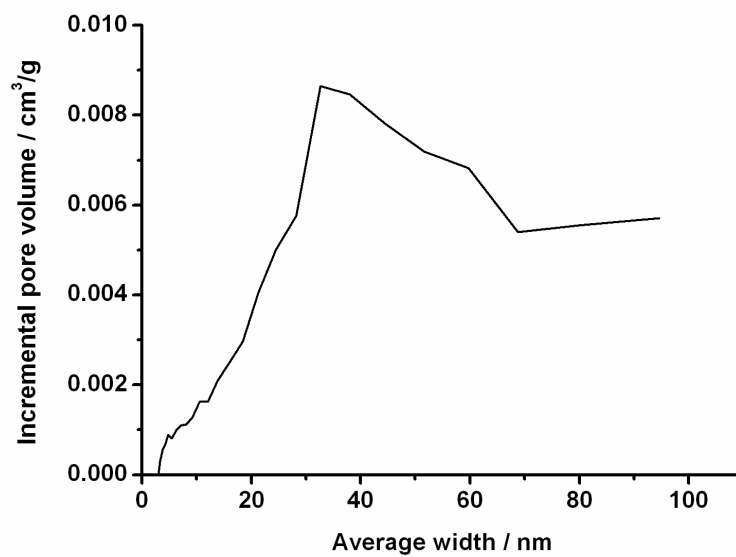

Fig. S4 Pore size distribution of **R3**.

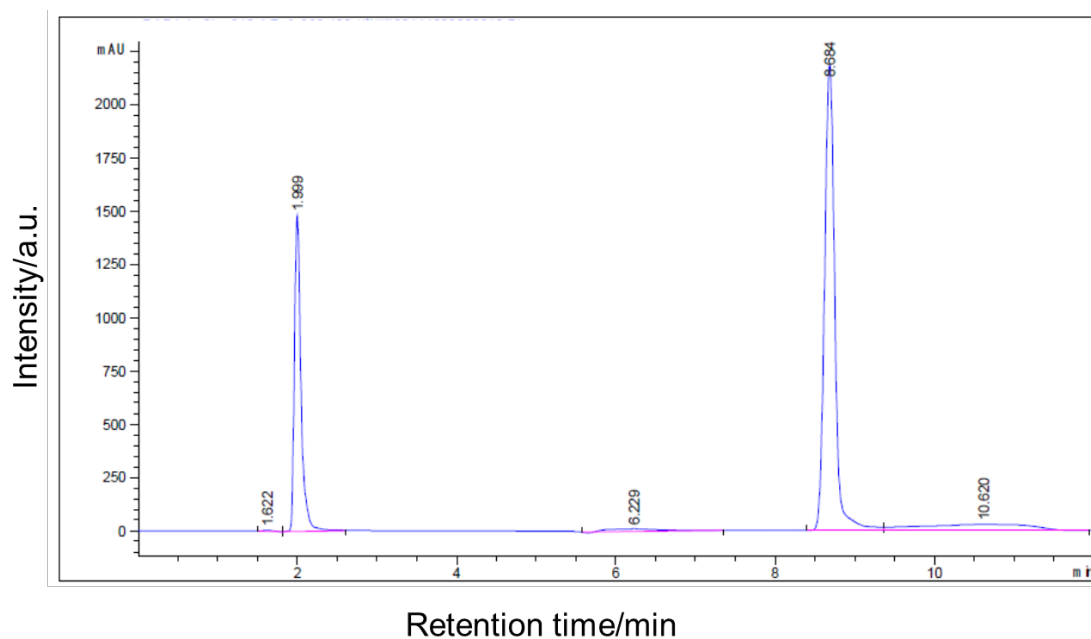

Fig. S5 HPLC analysis of the standard solution composed of commercial product THTO and THT. The two peaks at 1.999 min and 8.684 min are ascribed to signals of THTO and THT respectively.

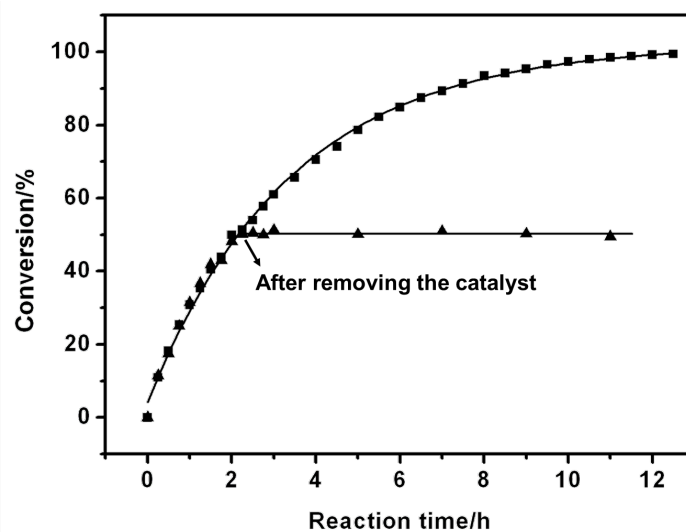

Fig. S6 Effect of removal of catalyst **R3** on the oxidation of THT. Without removal of **R3** (■); The arrow indicates the removal of **R3** (▲). Reaction conditions were the same.

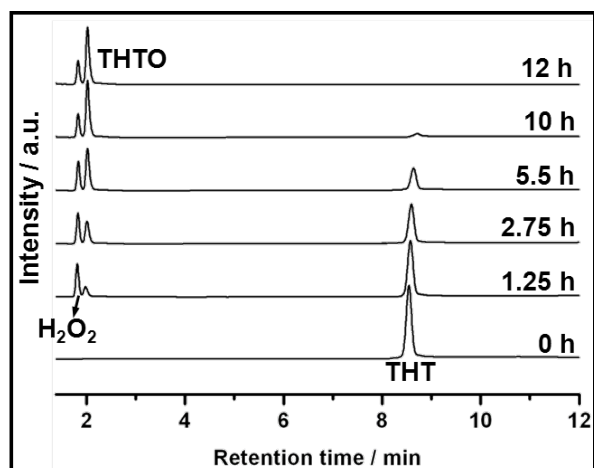

Fig. S7 HPLC analysis of the oxidation of THT with the heterogeneous catalyst **R3** for the second cycle.

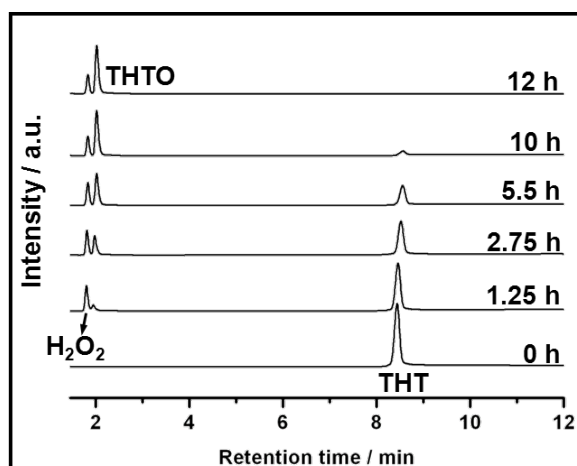

Fig. S8 HPLC analysis of the oxidation of THT with the heterogeneous catalyst **R3** for the third cycle.

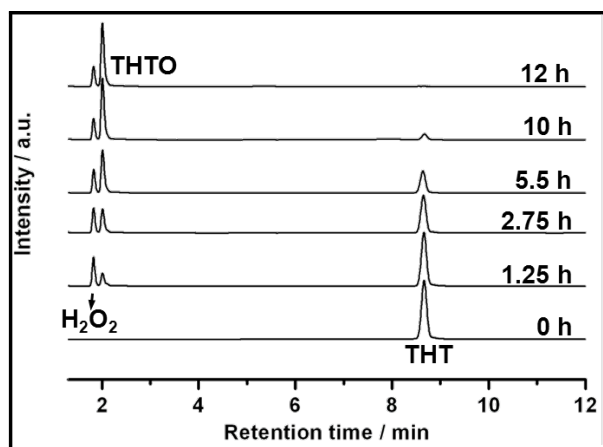

Fig. S9 HPLC analysis of the oxidation of THT with the heterogeneous catalyst **R3** for the fourth cycle.

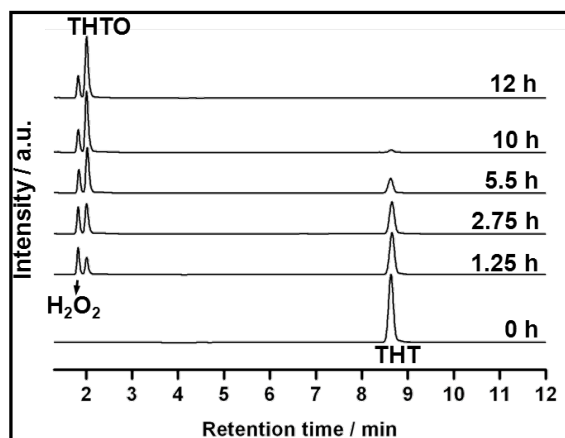

Fig. S10 HPLC analysis of the oxidation of THT with the heterogeneous catalyst **R3** for the fifth cycle.

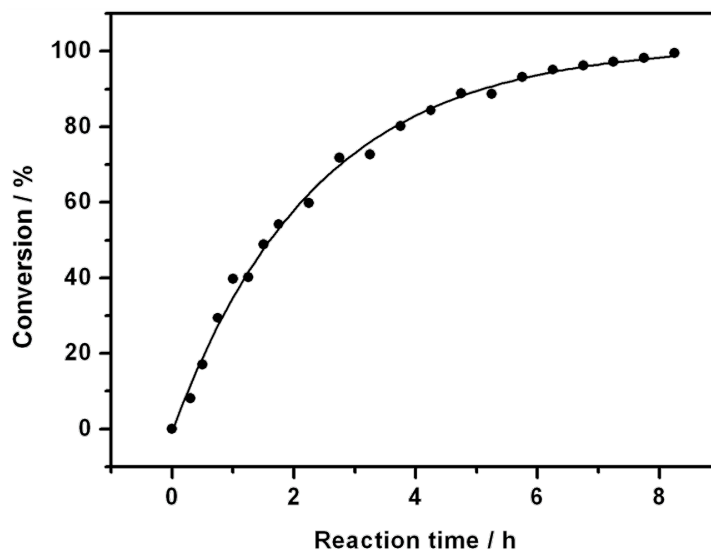

Fig. S11 THT conversion versus the reaction time with the homogeneous POM analog **A-POM** catalyst.

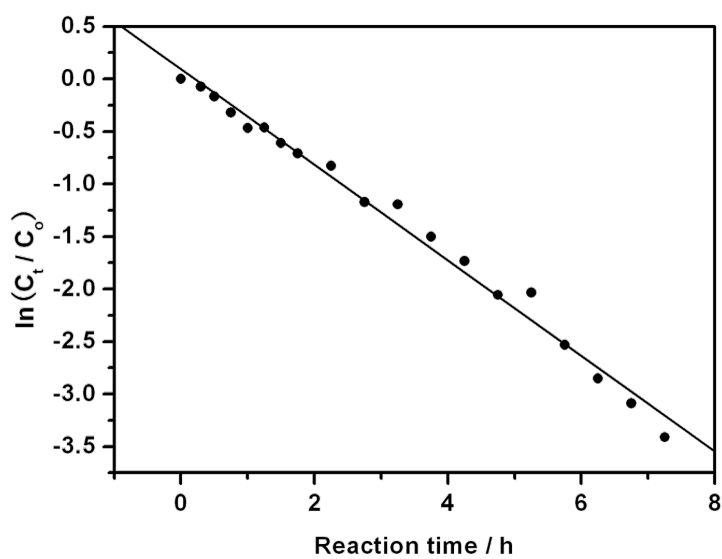

Fig. S12 THT  $\ln(C_t/C_0)$  versus the reaction time with the homogeneous POM analog **A-POM** catalyst. The reaction rate constant obtained from the slope is  $0.455 \text{ h}^{-1}$ .
